1 **Azacytidine targeting SARS-CoV-2 viral RNA as a potential treatment for**  
2 **COVID-19**

3 Xian Lin<sup>a, #</sup>, Xianliang Ke<sup>a, #</sup>, Lin Xia<sup>c</sup>, Tianying Zhang<sup>d</sup>, Hualong Xiong<sup>d</sup>,  
4 Binghai Zhao<sup>b, \*</sup>, Wen Liu<sup>c, \*</sup>, Quanjiao Chen<sup>a, \*</sup>, Chong Tang<sup>b, \*</sup>

5

6 <sup>a</sup>CAS Key Laboratory of Special Pathogens and Biosafety, Wuhan Institute of  
7 Virology, Center for Biosafety Mega-Science, CASCIRE, Chinese Academy of  
8 Sciences, 430071, Wuhan, China.

9 <sup>b</sup>Department of Pathophysiology, School of Medicine, Beihua University, Jilin  
10 132011, Jilin, China;

11 <sup>c</sup>Fujian Provincial Key Laboratory of Innovative Drug Target Research, School  
12 of Pharmaceutical Sciences, Xiamen University, Xiamen, Fujian 361102,  
13 China;

14 <sup>d</sup>State Key Laboratory of Molecular Vaccinology and Molecular Diagnostics,  
15 National Institute of Diagnostics and Vaccine Development in Infectious  
16 Diseases, School of Public Health, Xiamen University, Xiamen, Fujian 361102,  
17 China;

18 \* Correspondence: Binghai Zhao, email: [zhaobinghai01@vip.163.com](mailto:zhaobinghai01@vip.163.com); Wen  
19 Liu, email: [w2liu@xmu.edu.cn](mailto:w2liu@xmu.edu.cn); Quanjiao Chen ([chenqj@wh.iov.cn](mailto:chenqj@wh.iov.cn)); Chong  
20 Tang, [leochong718@gmail.com](mailto:leochong718@gmail.com)

21 <sup>#</sup>These authors contributed equally to this work.

22 **Running title: Azacytidine as potential COVID-19 treatment**

23 **Abstract**

24 The COVID-19 pandemic is a global health disaster. Moreover, emerging  
25 mutated virus strains present an even greater challenge for existing vaccines  
26 and medications. One possible solution is to design drugs based on the  
27 properties of virus epigenome, which are more common among coronaviruses.

28 Here, we reported an FDA-approved drug for myelodysplastic syndrome,  
29 azacytidine (5Aza), limited virus infection and protected mice against  
30 SARS-CoV-2. We demonstrated that this antiviral effect is related to 5Aza  
31 incorporation into viral RNA, which disrupt m5C RNA methylation modification  
32 profile. This work suggests that targeting viral epigenomes is a viable  
33 therapeutic strategy, potentially opening new pathways for treating COVID-19.

34

35

36

37

38

39

40

41

42

43

44

45

46

47

48 The COVID-19 pandemic is a global health disaster. Moreover, emerging  
49 mutated virus strains present an even greater challenge for existing vaccines  
50 and medications. One possible solution is to design drugs based on the  
51 properties of virus epigenome, which are more common among coronaviruses.

52 As an FDA-approved drug for myelodysplastic syndrome, 5Aza is a  
53 structural analog of cytidine (Fig.S1). It exhibits antiviral effects against several  
54 viruses. However, it is unknown whether this extends to SARS-CoV-2.

55 Here, we demonstrated that 5Aza shows potent antiviral activity in Vero E6  
56 cells, with half-maximal inhibitory concentration ( $IC_{50}$ ) = 6.99  $\mu$ M and selective  
57 index (SI) = 20.41 (Fig.1a). The viral titer in cell supernatants detection (Fig.1b)  
58 and indirect immunofluorescence assay (IFA) against viral N protein (Fig.1c)  
59 revealed 5Aza restricted SARS-CoV-2 infection in a dose-dependent manner.  
60 Time-of-drug-addition assay (Fig.S2a) showed that 5Aza functioned after virus  
61 entry (Fig.S2b, c, and d). The virus replication is still 50% suppressed when  
62 5Aza at 32  $\mu$ M is added 24 hours after infection (Fig. S3).

63 We then used 5Aza for *in vivo* antiviral evaluation in BALB/c mice infected  
64 with a mouse-adapted SARS-CoV-2 (MA-SARS-CoV-2) that exhibits high  
65 infectivity in mice. In clinical use, the recommended starting dose of 5Aza is 75  
66 mg/m<sup>2</sup> (equals to ~2mg/kg) in treating MDS. Therefore, mice were intranasally  
67 challenged with  $2 \times 10^3$  plaque-forming units (PFU) of MA-SARS-CoV-2,  
68 followed by intraperitoneal administration of 5Aza at 2 mg/kg body weight

69 (equal to 6 mg/m<sup>2</sup> surface area) at 1 d post infection (dpi), once daily for seven  
70 consecutive doses. As shown in Fig.1d, at 5 dpi, mice in 5Aza-treated group  
71 started to recovery body weight, while mice body weight in saline-treated group  
72 were still decreasing and 5/6 of mice lost more than 25% of body weight.  
73 In accordance with this, 83.33% (5/6) of saline-treated animals became  
74 moribund (defined as 25% loss of body mass) compared with 16.67% (1/6) in  
75 5Aza-treated group. Besides, the viral RNA copy number and titers in the  
76 lungs of 5Aza-treated mice also showed a significant decrease (Fig.1f).  
77 Moreover, histological examination revealed remarkable amelioration of lung  
78 damage at 4 dpi in the 5Aza group (Fig.S4c). In contrast, the saline group  
79 exhibited massive alveolar space mononuclear cell infiltration, moderately  
80 severe bronchiolar epithelial cell death, and intra-endothelium and  
81 perivascular infiltration of pulmonary blood vessels (Fig.S4b). The RNA-seq of  
82 lungs also demonstrated that the 5Aza rescued most downregulated genes  
83 with virus infection (Fig.S5), further demonstrated that 2 mg/kg 5Aza treatment  
84 protected against SARS-CoV-2 attack. Based on the dose used in mice is  
85 equivalent to that in treating MDS in humans, it would be encouraging to  
86 extend to human COVID therapy.

87 As an RNA analog with OH-group on ribose 2' carbon (2' C) (Fig.S1a),  
88 5Aza could theoretically incorporate into RNAs. High-resolution mass  
89 spectrometry analysis showed that RNA containing 5Aza increased ~40-fold

90 with short-term 5Aza treatment (Fig.S6). We took advantage of 5Aza stability  
91 in bisulfite treatment to develop a new method (5Aza-BSseq) that identifies the  
92 location where 5Aza is incorporated (Fig.S7). Notably, 5Aza-BSseq results  
93 also suggested efficient azacytidine incorporation into viral RNA (Fig.1g).

94 After deoxidized conversion to decitabine and incorporation into DNA, 5Aza  
95 causes endogenous retrovirus (ERV) DNA hypomethylation, which activates  
96 retroviral RNA transcription and triggers type I interferon response. In this study,  
97 decitabine was five times less efficient than 5Aza in inhibiting viral replication  
98 (Fig.S8). Additionally, 5Aza did not significantly increase ERV expression  
99 (Fig.S9). Therefore, 5Aza incorporation into RNA might be linked to its  
100 inhibitory effects on viral replication.

101 We further explored the possible antiviral mechanism of 5Aza  
102 incorporation into viral RNA. Previous research showed that 5Aza  
103 incorporation enhanced lethal mutagenesis on influenza virus. However, we  
104 found consistent mutations and comparable mutation rates in the viral RNA  
105 propagated in 5Aza-treated or control cells (Supplementary Table 1),  
106 excluding the role of 5Aza-induced lethal mutagenesis in anti-SARS-CoV-2.  
107 Considering that 5Aza sequesters tRNA methyltransferase to inhibit  
108 cytosine-C5 methylation ( $m^5C$ ) in tRNA<sup>1</sup> (the reaction principle is exhibited in  
109 Fig.S10), we further explored whether 5Aza incorporation affects viral RNA  
110 methylation. We used nanopore direct RNA sequencing to avoid false-positive

111 methylation sites caused by unconverted 5Aza, as assessed with bisulfite  
112 sequencing. The nanopore m<sup>5</sup>C identification algorithm, trained by m<sup>5</sup>C control  
113 data as well as many datasets, was used for data analysis. High-confidence  
114 m<sup>5</sup>C sites in 5Aza-treated viral RNA decreased significantly by 40% (false  
115 positive < 0.05) (Fig.1h). We further validated these m<sup>5</sup>C sites using the  
116 optimized RNA-BSseq and strict criteria (Fig.S11 and S12). All m<sup>5</sup>C sites  
117 identified through nanopore sequencing were also present in RNA-BSseq  
118 (Fig.S13).

119 The primary writers for m<sup>5</sup>C on mRNAs have been proposed to be NSUN2  
120 and DNMT2, which are demonstrated to contribute to m<sup>5</sup>C methylation on  
121 HIV-1 RNA and thus facilitate virus infection<sup>2,3</sup>. Here, we found that  
122 overexpression of DNMT2 and NSUN2, significantly promoted the  
123 SARS-CoV-2 replication (Fig.S14), implying both of DNMT2 and NSUN2 are  
124 responsible for the m<sup>5</sup>C methylation of SARS-CoV-2 RNA. The  
125 immunoprecipitation (IP) assay showed that DNMT2 and NSUN2 could bind to  
126 SARS-CoV-2 RNA (Fig. 1i). Notably, DNMT2 IPed more RNAs in the presence  
127 of 5Aza. As RNA methylation occurs, cytosine RNA methyltransferases  
128 (m<sup>5</sup>C-RMTs) form a covalent thioester bond, connecting the cysteine residue  
129 of its catalytic domain to the C6 position, thereby forming an m<sup>5</sup>C-RMT-RNA  
130 adduct. Next, RMT transfers a methyl group from the cofactor S-adenosyl  
131 methionine (SAM) to C5 of cytosine, followed by enzyme release from the

132 adduct  $\beta$ -elimination. 5Aza is a suicide mechanism-based inhibitor of  
133 m<sup>5</sup>C-RMTs<sup>4</sup>. RNAs containing 5Aza at the precise target site will sequester the  
134 m<sup>5</sup>C-RMT by generating RNA-m<sup>5</sup>C-RMT adducts, which will result in the  
135 decreased level of active endogenous enzymes<sup>5</sup>. Consistent with this theory,  
136 we observed an obvious decreased DNMT2, rather than NSUN2 protein upon  
137 5Aza treatment in SARS-CoV-2 infected cells (Fig. S15). It suggests that  
138 DNMT2 is more likely the main enzyme for m<sup>5</sup>C RNA methylation in  
139 SARS-CoV-2. Further investigations are underway to elucidate the relevance  
140 of m<sup>5</sup>C methylation and SARS-CoV-2 infection to 5Aza treatment.

141 In summary, we demonstrated that 5Aza can incorporate into  
142 SARS-CoV-2 RNA and disturb m<sup>5</sup>C RNA methylation modification, potentially  
143 contributing to 5Aza's anti-SARS-CoV-2 activity. We repurposed 5Aza as a  
144 promising candidate for combating COVID-19 and introduced the possibility of  
145 targeting viral epigenomes as a novel antiviral strategy.

146

147

## 148 **References**

- 149 1 Khoddami, V. & Cairns, B. R. Identification of direct targets and modified  
150 bases of RNA cytosine methyltransferases. *Nature Biotechnology* **31**, 458-464,  
151 doi:10.1038/nbt.2566 (2013).
- 152 2 Dev, R. R. *et al.* Cytosine methylation by DNMT2 facilitates stability and  
153 survival of HIV-1 RNA in the host cell during infection. *Biochem J* **474**,  
154 2009-2026, doi:10.1042/BCJ20170258 (2017).

- 155 3 Courtney, D. G. *et al.* Epitranscriptomic Addition of m(5)C to HIV-1  
156 Transcripts Regulates Viral Gene Expression. *Cell Host Microbe* **26**, 217-227  
157 e216, doi:10.1016/j.chom.2019.07.005 (2019).  
158 4 Santi, D. V., Garrett, C. E. & Barr, P. J. On the mechanism of inhibition of  
159 DNA-cytosine methyltransferases by cytosine analogs. *Cell* **33**, 9-10,  
160 doi:10.1016/0092-8674(83)90327-6 (1983).  
161 5 Schaefer, M., Hagemann, S., Hanna, K. & Lyko, F. Azacytidine inhibits RNA  
162 methylation at DNMT2 target sites in human cancer cell lines. *Cancer Res* **69**,  
163 8127-8132, doi:10.1158/0008-5472.CAN-09-0458 (2009).

164

165

## 166 **Acknowledgements**

167 We thank Tao Du, Jin Xiong, and other colleagues from BSL-3 Laboratory of  
168 Wuhan Institute of Virology and Wuhan National Biosafety Laboratory for their  
169 critical support and excellent coordination. We thank Prof. Meilin Jin of  
170 Huazhong Agricultural University for kindly providing mouse-adapted  
171 SARS-CoV-2 strain. We thank Editage ([www.editage.cn](http://www.editage.cn)) for English language  
172 editing. This work was supported by the National Science and Technology  
173 Major Projects (grant number 2020ZX10001016).

174

## 175 **Competing interest**

176 The authors declare no competing interests.

177

## 178 **Figure legend**

179 **Fig. 1 Azacytidine targets SARS-CoV-2 RNA to inhibit virus infection.**

180 **a, b, and c** The anti-SARS-CoV-2 effect of Azacytidine *in vitro*. Vero E6 cells

181 were infected with SARS-CoV-2 at MOI = 0.2 in the presence of different



182 doses of Azacytidine. The chloroquine was used as a drug control. At 24 hpi,  
183 cell supernatants were collected. **a** IC<sub>50</sub> and EC<sub>50</sub> were calculated by detecting  
184 viral RNA through RT-PCR and CCK-8 assay, respectively. Left and right  
185 Y-axes represent mean % inhibition of virus and % cytotoxicity of 5Aza,  
186 respectively. **b** Cell supernatants were collected at 24 hpi, and the viral titers  
187 were measured using the plaque assay. **c** Immunofluorescence microscopy of  
188 virus infection via probing N protein of SARS-CoV-2. Bars, 200 μM. **d, e, and f**  
189 The anti-SARS-CoV-2 effect of Azacytidine *in vivo*. 6–7 weeks old female  
190 BALB/c mice were randomly divided into three groups with 9 mice per group.  
191 Mice were intranasally challenged with  $2 \times 10^3$  PFU MA-SARS-CoV-2 in 50 μl  
192 DMEM (infection groups) or equal DMEM (mock infection). At 1 dpi, mice were  
193 intraperitoneally injected with 2 mg/kg 5Aza (SARS-CoV-2+5Aza group) or an  
194 equivalent volume of sterile saline (SARS-CoV-2+saline and mock infection  
195 groups), once daily for seven consecutive doses. **d** body weight was measured  
196 daily for 7 d (n=6), mice with 25% body weight loss were considered moribund  
197 and euthanized. Note: the remaining one mouse (body weight loss less than  
198 25%) in SARS-CoV-2+saline group was not recorded at dpi 6 and 7. **e** the  
199 survival rates of mice (n=6); mice with more than 25% of body weight loss in **d**  
200 were considered moribund and euthanized. **f** at 4 dpi, three mice per group  
201 were euthanized for detecting viral RNA copy and virus titer in the lungs. **g** The  
202 pseudo m<sup>5</sup>C locations indicated incorporated azacytidine. Vero-E6 cells were

203 infected with 1 moi SARS-CoV-2 in the presence of 10  $\mu$ M 5Aza or saline.  
204 After 12 h, total RNA was isolated and comparison of 5Aza-treated viral RNA  
205 with the control using bisulfite sequencing was performed; the non-overlapping  
206 points are pseudo m<sup>5</sup>C locations that indicate where 5Aza was incorporated. **h**  
207 RNAs of cells infected with SARS-CoV-2 that treated with or without 5Aza  
208 were subjected to Nanopore direct RNA sequencing. **i** Vero E6 cells transiently  
209 overexpressing DNMT2, NSUN2, or GFP with a HA tag were infected with 0.2  
210 moi SARS-CoV-2 for 20 h, in the presence of 16  $\mu$ M 5Aza or not. Lysates were  
211 prepared and split for incubation with mouse anti-HA antibody. Co-precipitated  
212 RNA was analyzed by qRT-PCR using primer sets targeting viral S gene. The  
213 level of viral RNA amplicon was determined as the percentage of input (1% of  
214 lysate) (right); the expression of indicated protein and products of IP was  
215 validated by western blot (left). Data are means  $\pm$  SD analyzed using Student's  
216 *t* test or One-way ANOVA (body weight change); Log-rank test was used to  
217 analyze the significance of survival differences. \*  $p < 0.05$ , \*\*  $p < 0.01$ , \*\*  $p <$   
218 0.001.

219

220

221

222

223

224 Fig. 1

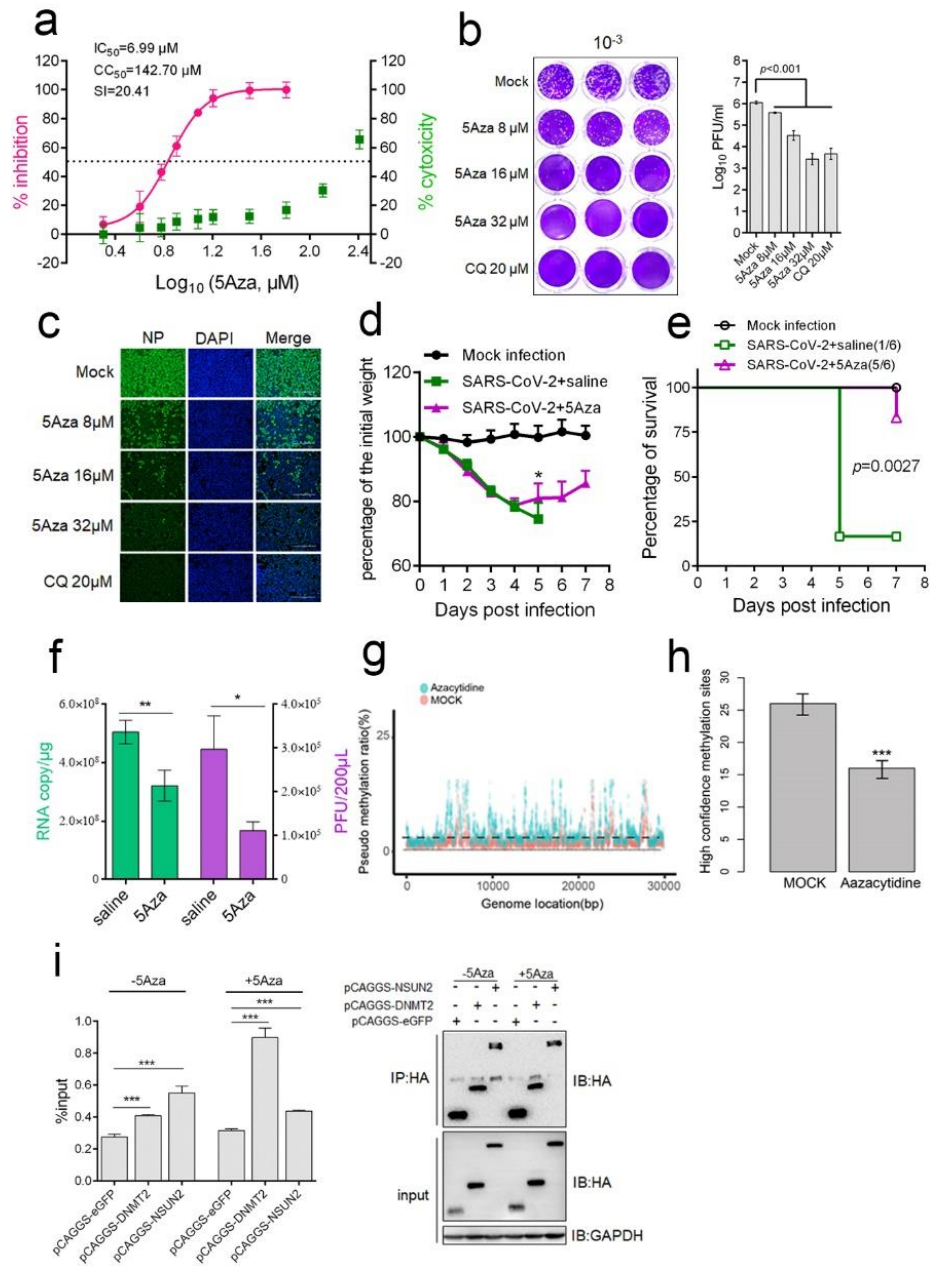

Source: https://www.biorxiv.org/content/10.1101/2021.09.01.458475v1.full.pdf
